# Supplementary material
Source: publisher figshare collection journal article supplement (https://acs.figshare.com/ndownloader/files/26691436)
Supplement: Supplementary file 1 [file 26691436]

## Supporting Information

### **Fabrication of highly monodisperse and small-grain platinum hole–cylinder nanoparticles as a cathode catalyst for Li–O<sub>2</sub> batteries**

*Keon Hee Park<sup>†</sup>, Do Youb Kim<sup>‡</sup>, Ju Ye Kim<sup>†,€</sup>, Minki Kim<sup>†</sup>, Geun-Tae Yun<sup>†</sup>, Yesol Kim<sup>†</sup>, Heeun Joo<sup>†</sup>, Sungho Choi<sup>‡</sup>, Jungdon Suk<sup>‡</sup>, Yongku Kang<sup>‡,¶</sup>, Mihye Wu<sup>†,‡,§,\*</sup>, Woo-Bin Jung<sup>†,§,¶,\*</sup> and Hee-Tae Jung<sup>†,§,\*</sup>*

<sup>†</sup>Department of Chemical and Biomolecular Engineering (BK-21 Plus), Korea Advanced Institute of Science and Technology (KAIST), Daejeon 34141, Korea

<sup>‡</sup>Advanced Materials Division, Korea Research Institute of Chemical Technology, Yuseong-gu, Daejeon 34114, Korea

<sup>€</sup> Chemical & Process Technology Division, Korea Research Institute of Chemical Technology, Yuseong-gu, Daejeon 34114, Korea

<sup>§</sup>Korea Advanced Institute of Science and Technology (KAIST) Institute for Nanocentury, Daejeon 34141, Korea

<sup>¶</sup>School of Engineering and Applied Sciences, Harvard University, Cambridge, Massachusetts 02138, USA.

<sup>¶</sup>Department of Chemical Convergence Materials, University of Science and Technology (UST), Yuseong-gu, Daejeon 34113, Korea

#### **Corresponding authors**

**Hee-Tae Jung** (heetae@kaist.ac.kr)

**Woo-Bin Jung** (woobinjung@seas.harvard.edu)

**Mihye Wu** (wumihye@kriect.re.kr)

## Morphology analysis of Pt hole-cylindrical nanopatterns

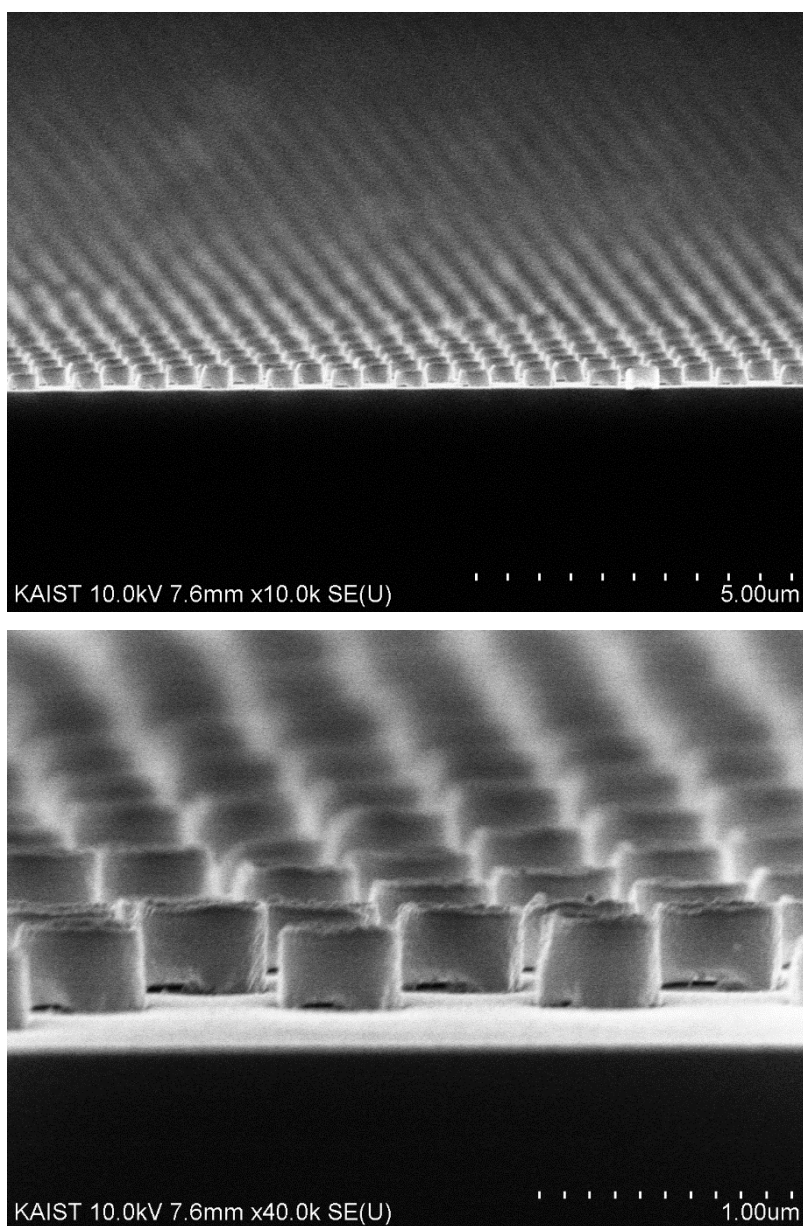

**Figure S1: Low magnification and high magnification SEM image of Pt hole-cylindrical nanopattern fabricated over a large area from the side view.**

## TEM images and EDS line profile of GNP and Pt hole-cylinder nanoparticles

**Figure S2** shows the Pt catalyst of the hole-cylinder morphology, and it can be seen that the Pt-hole-cylinder nanoparticles are well attached to the catalyst support GNP.

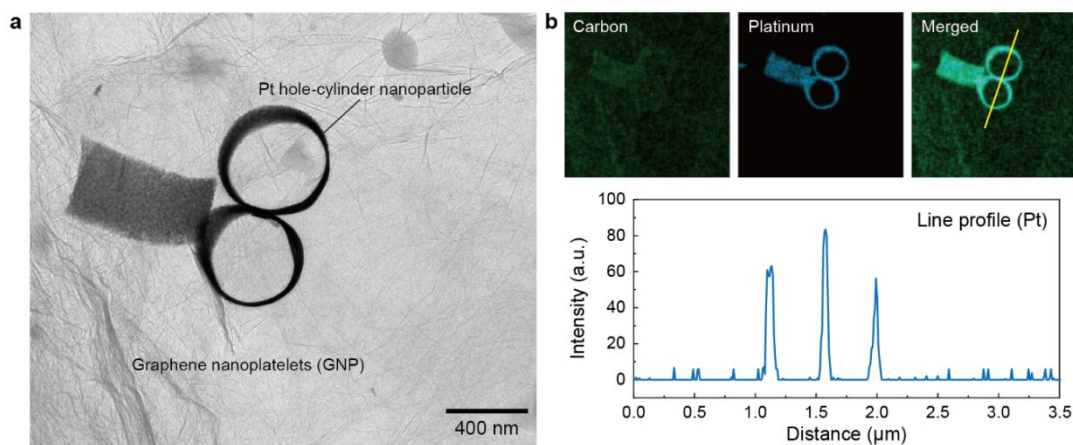

**Figure S2:** (a) TEM images of GNP and Pt hole-cylinder nanoparticles. (b) TEM-EDS mapping images and line profile of GNP and Pt hole-cylinder nanoparticles.

### Electrochemical performance of electrodes in discharge/charge profile at first-cycle

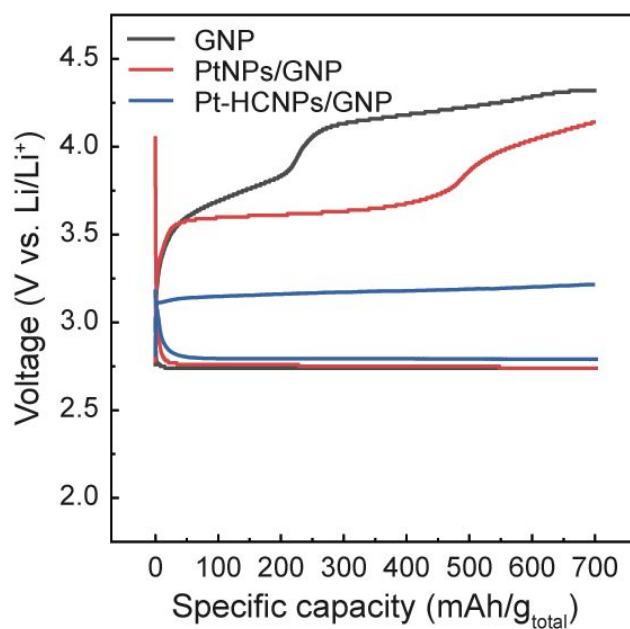

**Figure S3: First-cycle discharge/charge profile of Li–O<sub>2</sub> cells with GNP, PtNPs/GNP, and Pt-HCNPs/GNP electrodes under a 70 mA g<sup>-1</sup> to capacity of 700 mAh g<sup>-1</sup>.**

Electrochemical performance of electrodes in discharge/charge profile at the selected cycles

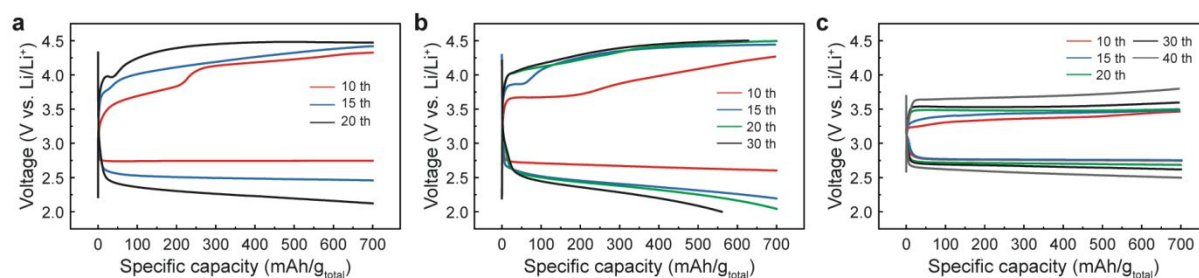

**Figure S4: Discharge/charge profile of Li–O<sub>2</sub> cells at the selected cycles with (a) GNP, (b) PtNPs/GNP, and (c) Pt-HCNPs/GNP electrodes under a 70 mA g<sup>-1</sup> to capacity of 700 mAh g<sup>-1</sup>.**

## The specific capacity of the electrodes

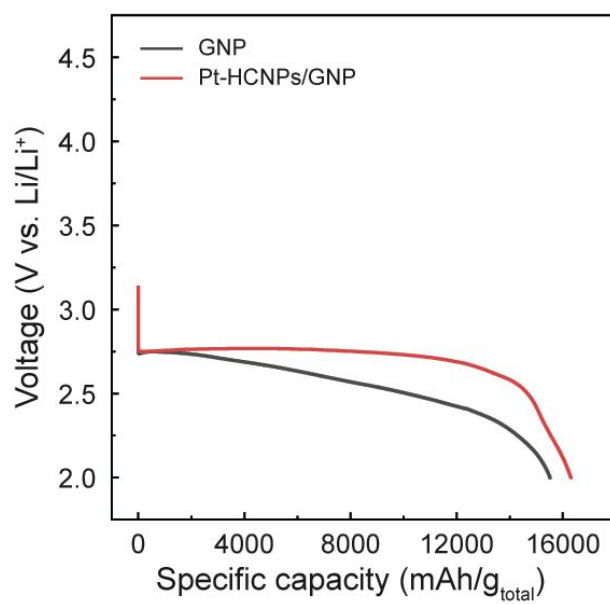

**Figure S5: The full discharge profiles of GNP and Pt-HCNPs/GNP electrodes under a 100 mA g<sup>-1</sup> to 2.0 V.**

### Morphology of discharge product

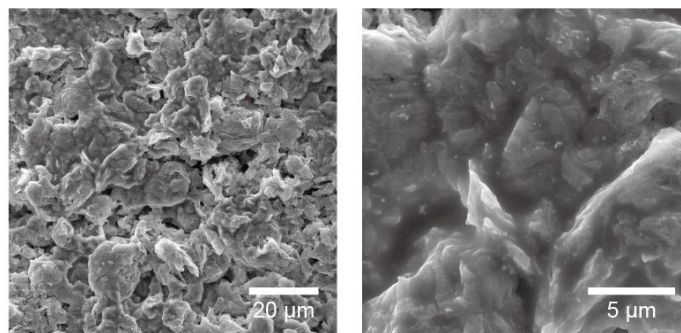

Figure S6: SEM images of PtNPs/GNP after discharge

## Discharge product analysis

In **Figure S7**, the peak of crystalline  $\text{Li}_2\text{O}_2$  can be seen in the XRD pattern of the discharged GNP electrode, whereas in the case of the XRD pattern of the discharged Pt-HCNPs/GNP electrode, the peak of crystalline  $\text{Li}_2\text{O}_2$  cannot be seen.



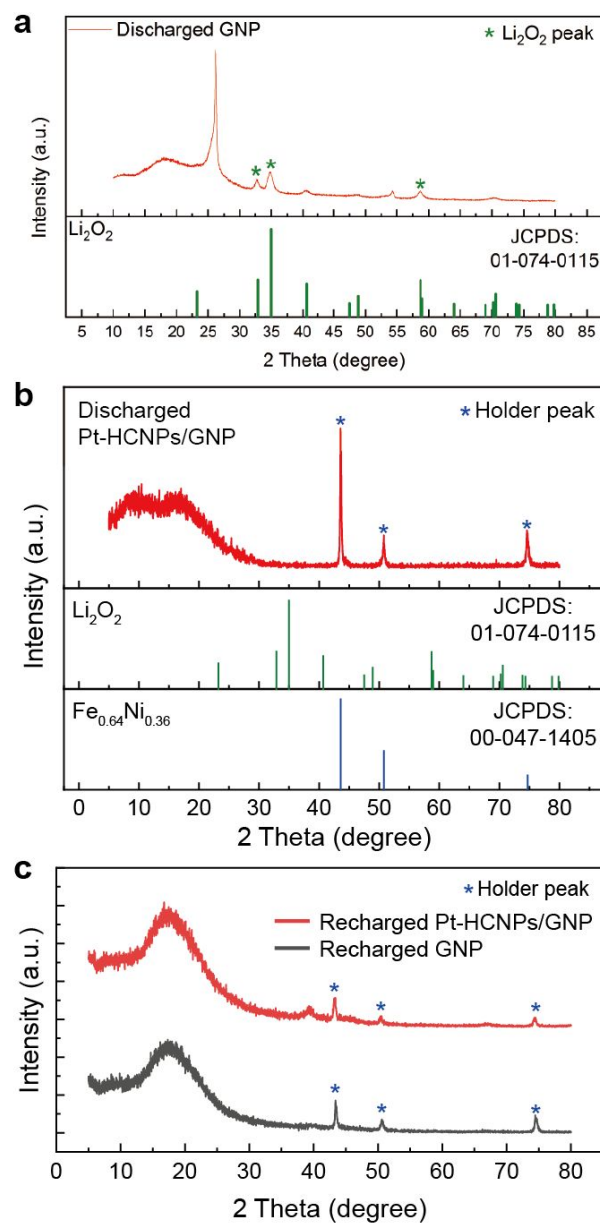

**Figure S7: XRD pattern of (a) GNP electrode after discharge (b) Pt-HCNPs/GNP electrode after discharge (c) GNP and Pt-HCNPs/GNP electrodes after recharge**

## Pristine and recharged cathode analysis

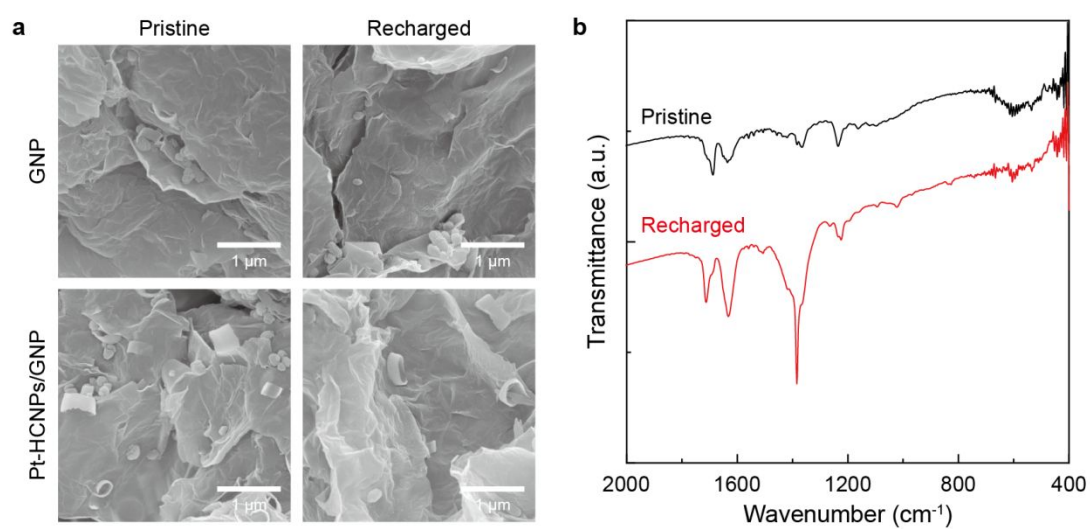

**Figure S8: Pristine and recharged cathodes (a) SEM images of GNP and Pt-HCNPs/GNP (b) IR spectra of Pt-HCNPs/GNP.**

## Overpotential comparison

**Table S1.** Comparison of overpotential of Pt-HCNPs/GNP cathode with other reported Pt-based catalysts

| Cathode                                 | Electrolyte                                    | Current density (mA g <sup>-1</sup> ) | Overpotential (V vs. Li/Li <sup>+</sup> ) | Ref                                                                 |
|-----------------------------------------|------------------------------------------------|---------------------------------------|-------------------------------------------|---------------------------------------------------------------------|
| Pt-HCNPs/GNP                            | 1M LiNO <sub>3</sub> in DMA                    | 100                                   | 0.41 V                                    | <b>This work</b>                                                    |
| CNF@Pt                                  | 1M LiNO <sub>3</sub> in DMA                    | 500                                   | 0.9 V                                     | <i>Carbon</i> <b>2018</b> , 130, 94-104                             |
| Pt/CNTs/Ni foam                         | 1M LiTFSI in TEGDME                            | 160                                   | 1.1 V                                     | <i>ACS Appl. Mater. Interfaces</i> <b>2014</b> , 6, 15, 12479–12485 |
| Pt/ $\alpha$ -MnO <sub>2</sub> nanotube | 1M LiClO <sub>4</sub> in DMSO                  | 70                                    | 1.07 V                                    | <i>Nano Energy</i> <b>2014</b> , 10, 19-27                          |
| Pt-Cu core-shell on carbon              | 1M LiCF <sub>3</sub> SO <sub>3</sub> in TEGDME | 100                                   | 0.5 V                                     | <i>Nano Lett.</i> <b>2016</b> , 16, 781-785                         |
| Pt-coated BND-Co@Graphene               | 1M LiCF <sub>3</sub> SO <sub>3</sub> in TEGDME | 100                                   | 0.88 V                                    | <i>Adv. Energy Mater.</i> <b>2019</b> , 9, 1900662                  |
| Pt bulk-doped BND-Co@Graphene           | 1M LiCF <sub>3</sub> SO <sub>3</sub> in TEGDME | 100                                   | 0.55 V                                    | <i>Adv. Energy Mater.</i> <b>2019</b> , 9, 1900662                  |
